# Supplementary material for: Mutations in phospholipase C eta-1 (PLCH1) are associated with holoprosencephaly
Source: HighWire-hosted journal article supplement (doi:10.1136/jmedgenet-2020-107237), 2021-04-05
Supplement: jmedgenet-2020-107237supp001_data_supplement.pdf [file jmedgenet-2020-107237supp001_data_supplement.pdf]

**Supplementary Table**

Title: Exome filtering scheme and the list of survived and potential pathogenic variants found in Family one and Family two.

|                                                                                                                                             | <b>Family One</b>                                                                                                                                                                                                                                                                                                                                                                                          | <b>Family Two</b>                                                                                                                  |
|---------------------------------------------------------------------------------------------------------------------------------------------|------------------------------------------------------------------------------------------------------------------------------------------------------------------------------------------------------------------------------------------------------------------------------------------------------------------------------------------------------------------------------------------------------------|------------------------------------------------------------------------------------------------------------------------------------|
| <b>Filtering Scheme</b>                                                                                                                     |                                                                                                                                                                                                                                                                                                                                                                                                            |                                                                                                                                    |
| <b>Total number of variants</b>                                                                                                             | 38019                                                                                                                                                                                                                                                                                                                                                                                                      | 166318 + 171659                                                                                                                    |
| <b>Homozygous variants</b>                                                                                                                  | 15731                                                                                                                                                                                                                                                                                                                                                                                                      | 94128 + 100282                                                                                                                     |
| <b>Coding/splicing</b>                                                                                                                      | 9991                                                                                                                                                                                                                                                                                                                                                                                                       | 3596 + 3516                                                                                                                        |
| <b>Family One: 1000 genomes<br/>MAF &lt;0.001</b>                                                                                           | 621                                                                                                                                                                                                                                                                                                                                                                                                        | na                                                                                                                                 |
| <b>Family Two: concordance</b>                                                                                                              | na                                                                                                                                                                                                                                                                                                                                                                                                         | 26                                                                                                                                 |
| <b>Within the autozygome</b>                                                                                                                | 22                                                                                                                                                                                                                                                                                                                                                                                                         | 23                                                                                                                                 |
| <b>Family One: Human Saudi<br/>Genome Project database:<br/>frequency &lt;0.01</b><br><br><b>Family Two: gnomAD<br/>frequency &lt;0.001</b> | <ol style="list-style-type: none"> <li>1. <i>PLCH1</i>:NM_001130960.1:c.2109T&gt;C, p.(=) (synonymous SNV)</li> <li>2. <i>PLCH1</i>:NM_001130960.1:c.2065C&gt;T: p.(Arg689*) (stopgain)</li> <li>3. <i>SMC4</i>:NM_005496:c.2673C&gt;A:p.I891I (synonymous SNV)</li> <li>4. <i>C20orf141</i>:NM_080739:c.265G&gt;A:p.A89T (nonsynonymous SNV)</li> <li>5. <i>PCNA</i>: NM_002592:c.388-18A&gt;C</li> </ol> | <ol style="list-style-type: none"> <li>1. <i>PLCH1</i>:NM_001130960.1:c.3236CA&gt;C: p.(Cys1079ValfsTer16) (frameshift)</li> </ol> |
| <b>Predicted to be pathogenic</b>                                                                                                           | <ol style="list-style-type: none"> <li>1. <i>PLCH1</i>:NM_001130960.1:c.2065C&gt;T: p.(Arg689*) (stopgain)</li> </ol>                                                                                                                                                                                                                                                                                      | <ol style="list-style-type: none"> <li>1. <i>PLCH1</i>:NM_001130960.1:c.3236CA&gt;C: p.(Cys1079ValfsTer16) (frameshift)</li> </ol> |
