# Supplementary material for: Mutations in phospholipase C eta-1 (PLCH1) are associated with holoprosencephaly
Source: HighWire-hosted journal article supplement (doi:10.1136/jmedgenet-2020-107237), 2021-04-05
Supplement: jmedgenet-2020-107237supp003_data_supplement.pdf [file jmedgenet-2020-107237supp003_data_supplement.pdf]

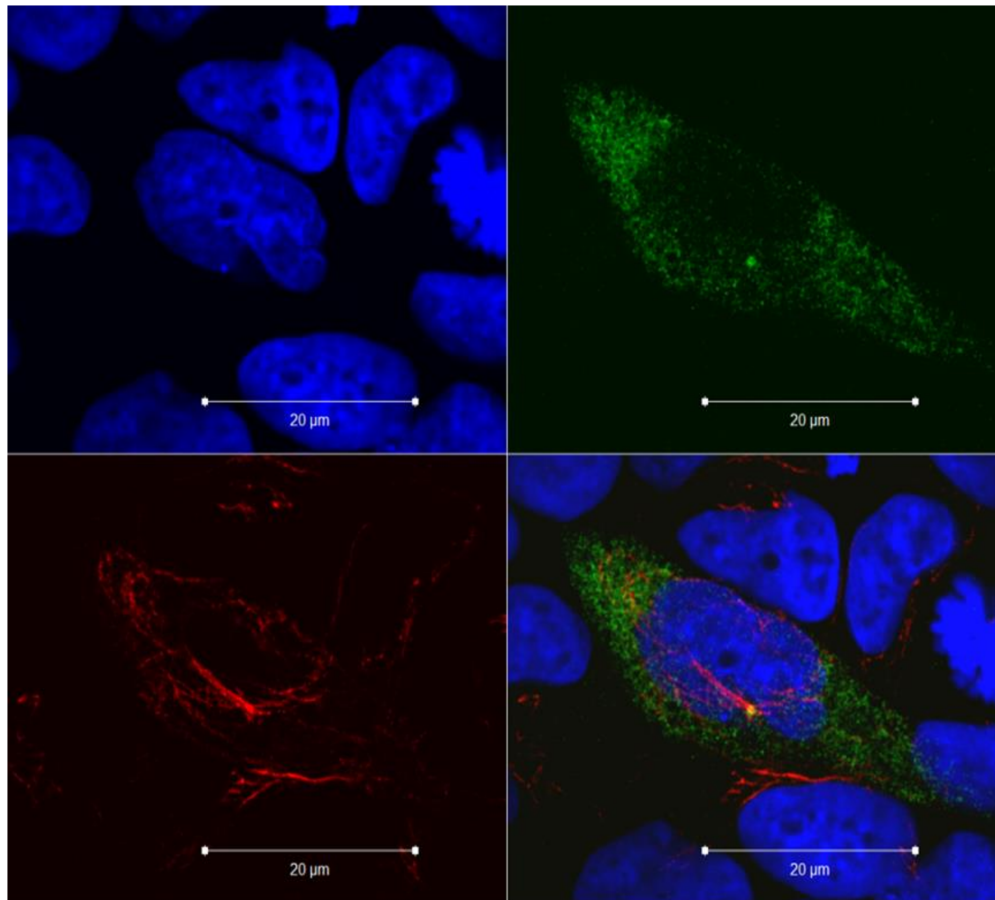

Title: Assessment of the subcellular localisation of PLCH1, with the primary cilium identified.

Legend: Confocal Microscopy images of immunofluorescent studies of the localisation of wild-type PLCH1 (green) in 1-7 HB2 cells with primary cilia identified by (red). PLCH1 is distributed throughout the cytoplasm of the cell. PLCH1 was not being present in the primary cilium or nucleus. Green shows FLAG-tagged PLCH1, red shows acetylated  $\alpha$ -tubulin as a primary cilia marker, and the nucleus identified in blue by DAPI.
